# Supplementary material for: The Durability of Public Goods Changes the Dynamics and Nature of Social Dilemmas
Source: PubMed Central journal article supplement (PMC1899228; doi:10.1371/journal.pone.0000593), 2007-07-04

Figure S1. Snowdrift game ( $T = 1.5$ ,  $S = 0.5$ ), public good ( $e$ ) – cooperator ( $p$ ) phase plane, independent rates of production and decay ( $c = 1$ , variable  $u$ ), stable coexistence of cooperators and defectors at at ( $p^* = (u/c)e^*$ ,  $e^* = S/(S+T-1)$ ). Lines illustrate simulated trajectories for differing values of  $u$  (from 0.05 to 1), from initial position  $p_0 = 0.3$ ,  $e_0 = 0$ .

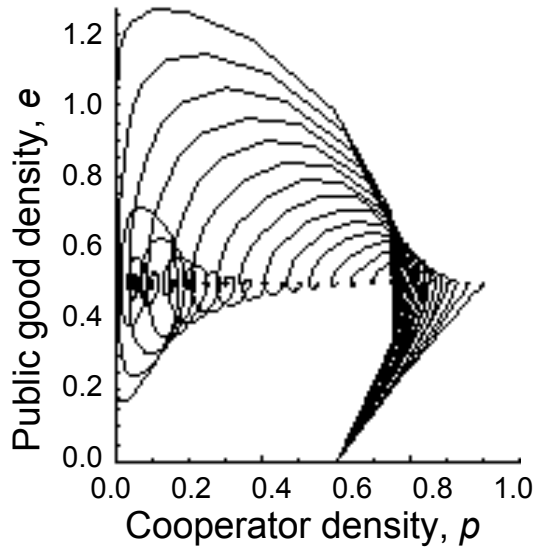

Supplement: pone.0000593.s001.pdf [file pone.0000593.s001.pdf]
