# Supplementary material for: The Durability of Public Goods Changes the Dynamics and Nature of Social Dilemmas
Source: PubMed Central journal article supplement (PMC1899228; doi:10.1371/journal.pone.0000593), 2007-07-04

Figure S2. Stag-hunt game ( $T = 0.5$ ,  $S = -0.5$ ), public good ( $e$ ) – cooperator ( $p$ ) phase plane, independent rates of production and decay ( $c = 0.1$ , variable  $u$ ). Lines illustrate simulated separatrices demarcating the basins of attraction for pure cooperator and pure defector equilibria (closed circles). Unstable equilibria (open circles) at ( $p^* = (u/c)e^*$ ,  $e^* = S/(S+T-1)$ ). Lines represent differing values of  $u$  (0.01, 0.1, 0.15). Note the line  $u = 0.1$  corresponds to the line  $x = 0.1$  in Fig. 3b.

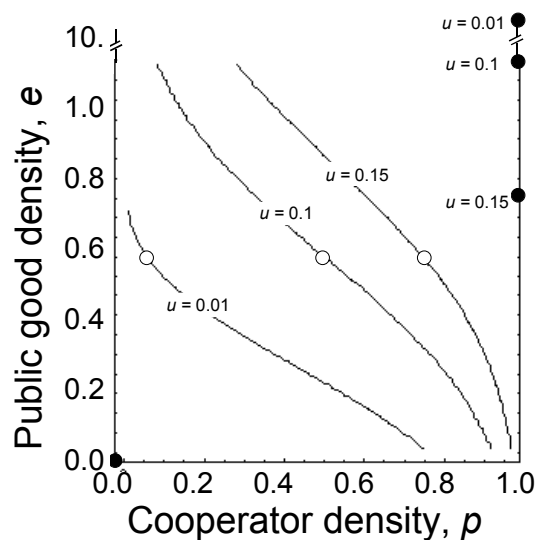

Supplement: pone.0000593.s002.pdf [file pone.0000593.s002.pdf]
